# Supplementary material
Source: PubMed Central journal article supplement (PMC8219056)

**Disclosure Purpose:** 21-08620

Summary of Interests

I do not have any interests to disclose at this time.

Additional Questions:

- 1. **Are there other relationships or activities that readers could perceive to have influenced, or that give the appearance of potentially influencing, what you wrote in the submitted work?**  
No.
- 2. **What is the manuscript title?**  
Delayed Large Local Reactions to mRNA COVID-19 Vaccines in Black, Indigenous, and People of Color
- 3. **Are you the corresponding author?**  
No.

Certification

I certify that the information provided in this disclosure is complete and accurate.

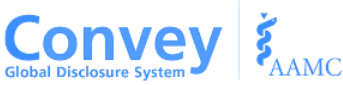

**Disclosure Purpose:** 21-08620

### Summary of Interests

I do not have any interests to disclose at this time.

### Additional Questions:

- Are there other relationships or activities that readers could perceive to have influenced, or that give the appearance of potentially influencing, what you wrote in the submitted work?**  
No.
- What is the manuscript title?**  
Delayed Large Local Reactions to mRNA COVID-19 Vaccines in Black, Indigenous, and People of Color
- Are you the corresponding author?**  
Yes.
  - Please list the other authors' names here.**  
Santiago Alvarez, Upeka Samarakoon

### Certification

I certify that the information provided in this disclosure is complete and accurate.

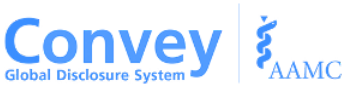

**Disclosure Purpose:** 21-08620

### Summary of Interests

I do not have any interests to disclose at this time.

### Additional Questions:

- Are there other relationships or activities that readers could perceive to have influenced, or that give the appearance of potentially influencing, what you wrote in the submitted work?**  
No.
- What is the manuscript title?**  
Delayed Large Local Reactions to mRNA COVID-19 Vaccines in Black, Indigenous, and People of Color
- Are you the corresponding author?**  
No.

### Certification

I certify that the information provided in this disclosure is complete and accurate.

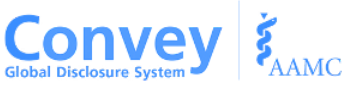

Supplement: NEJMc2108620_disclosures.pdf [file NEJMc2108620_disclosures.pdf]
